# Supplementary material for: Mesothelial cells are not a source of adipocytes in mice
Source: PubMed Central journal article supplement — Cell Rep. Author manuscript; Available in PMC 2021 Jul 28. (PMC8317472; doi:10.1016/j.celrep.2021.109388), 2021-07-13
Supplement: NIHMS1724272-supplement-1.pdf [file NIHMS1724272-supplement-1.pdf]

**Cell Reports, Volume 36**

**Supplemental information**

**Mesothelial cells are not a source of adipocytes in mice**

**Gregory P. Westcott, Margo P. Emont, Jin Li, Christopher Jacobs, Linus Tsai, and Evan D. Rosen**

**Figure S1, related to Figure 1.** WT1 is expressed by both preadipocyte and mesothelial populations in human omental adipose tissue.

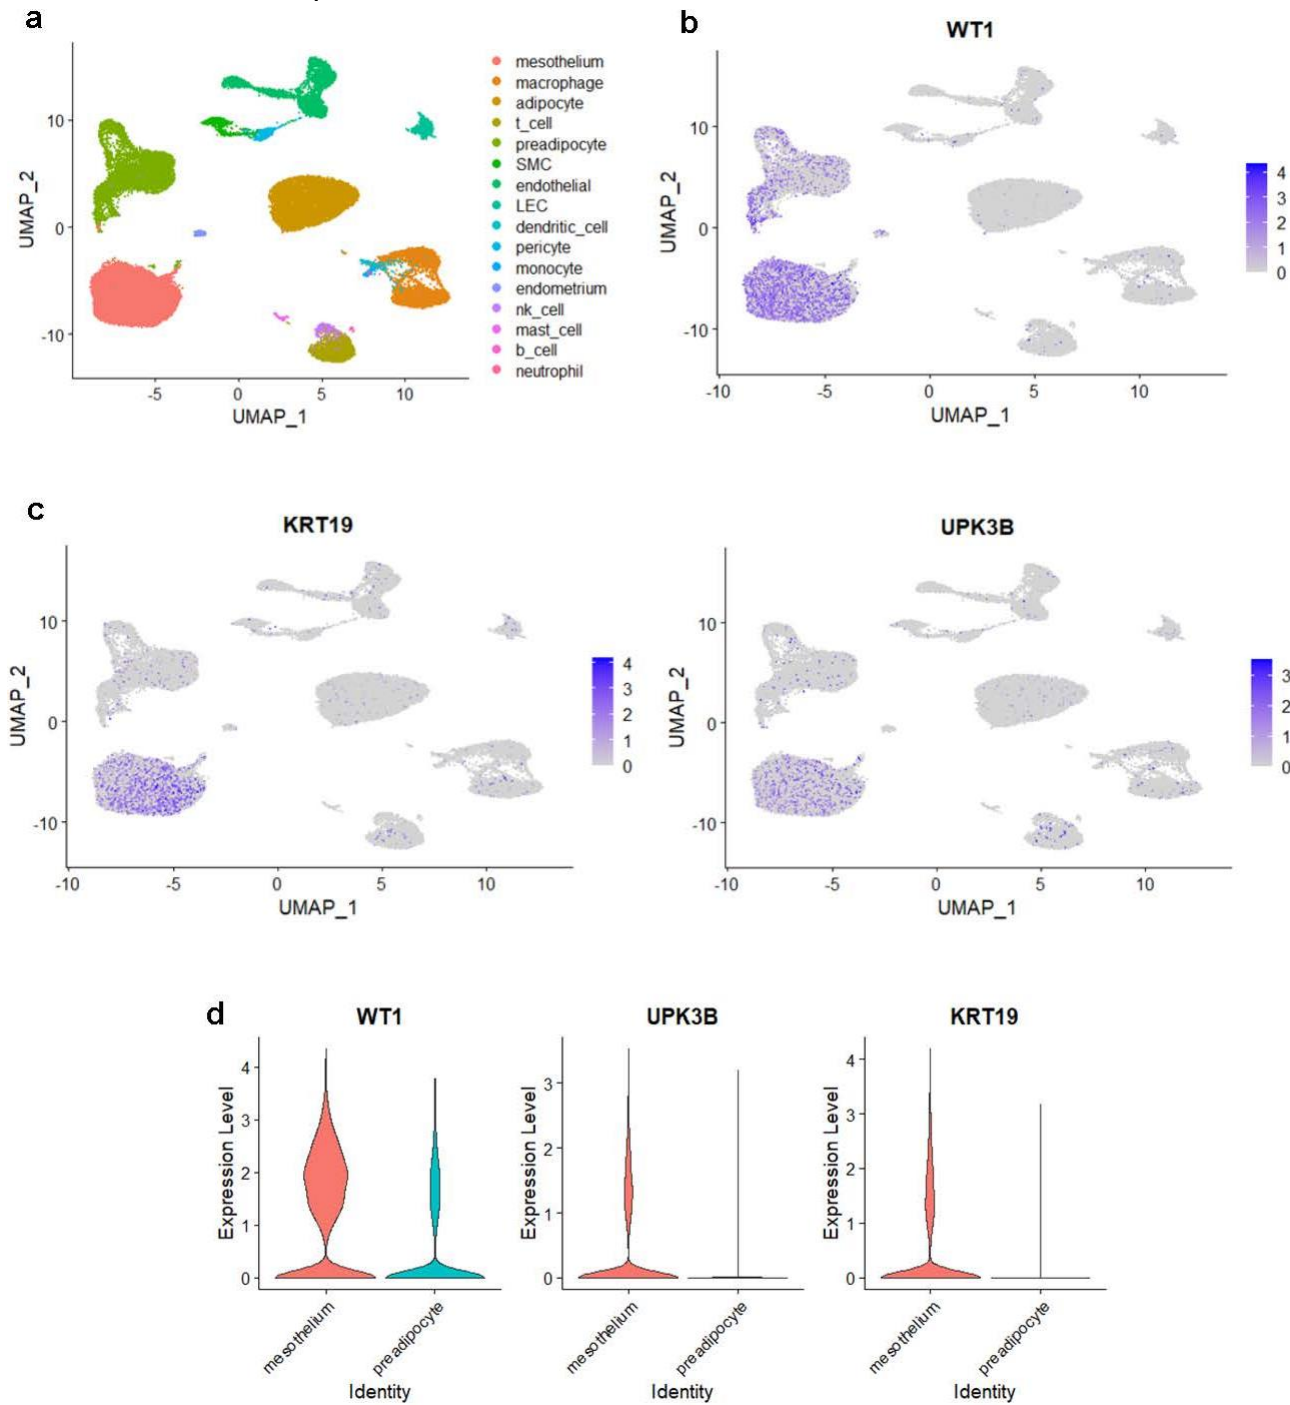

**a**, UMAP of human omental single-nucleus RNA-sequencing data demonstrates distinct preadipocytes and mesothelial populations. **b-c**: Feature plots of *WT1*, *KRT19*, *UPK3B*. **d**, Violin plots of *WT1*, *UPK3B*, and *KRT19* in mesothelial and preadipocyte populations. SMC, smooth muscle cell; LEC, lymphatic endothelial cell.



**Figure S3, related to Figure 4.** Krt19+ mesothelial cells do not differentiate into adipocytes regardless of mouse sex, prolonged HFD, or aging.

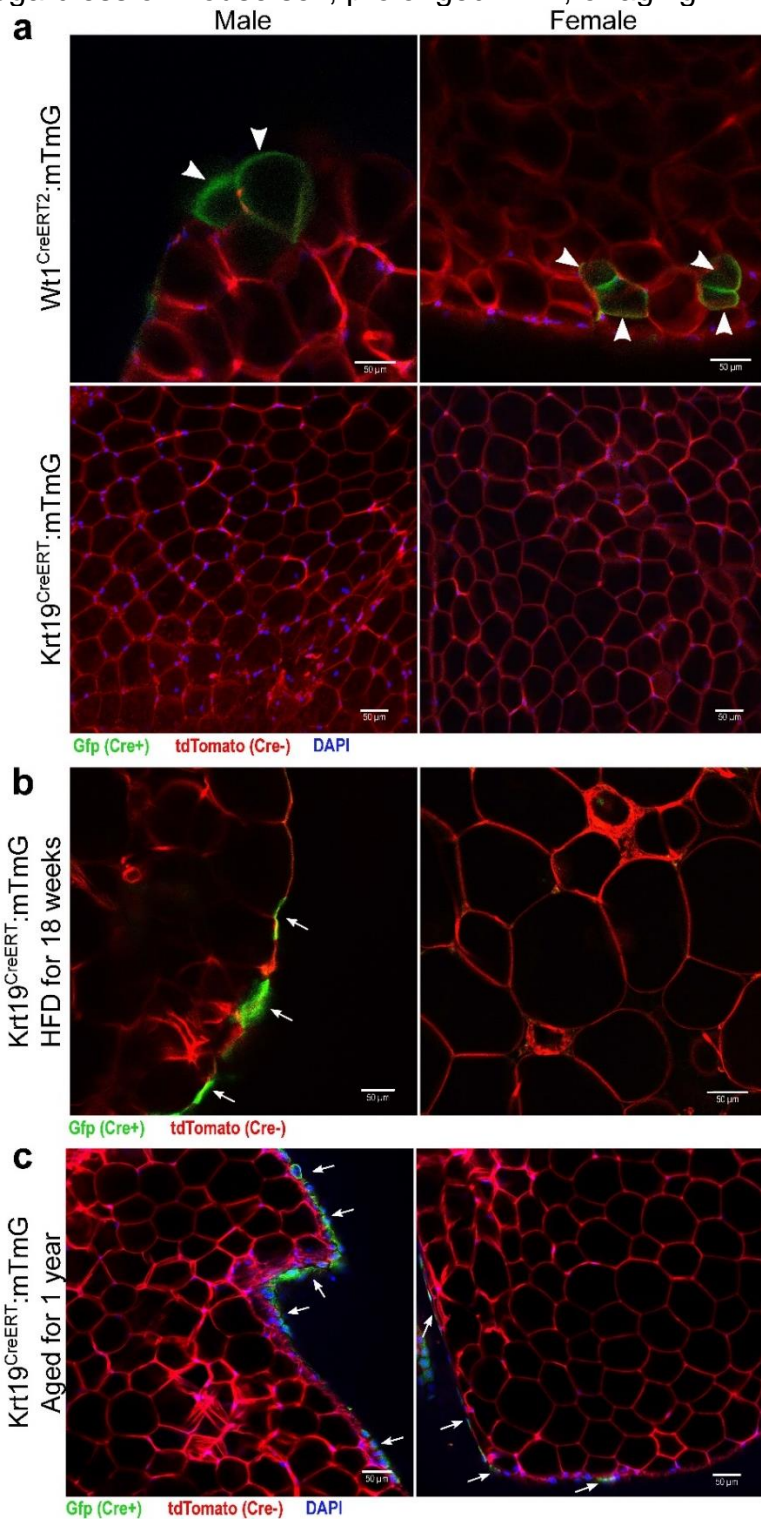

**a**, Male and female perigonadal VAT depots were examined for the presence of GFP-labeled adipocytes. **b**, Perigonadal fat was examined after an 18-week course of HFD, and **c**, one year of aging post-tamoxifen. Arrow heads: GFP-positive adipocytes; arrows: GFP labeling of the mesothelial layer. Representative images are shown.

**Table S1, related to Figures 2 and 3. qPCR primer sequences**

| <b>Gene</b> | <b>Forward primer</b>  | <b>Reverse primer</b>    |
|-------------|------------------------|--------------------------|
| Adipoq      | GCACTGGCAAGTTCTACTGCAA | GTAGGTGAAGAGAACGGCCTTGT  |
| Dcn         | TCTTGGGCTGGACCATTTGAA  | CATCGGTAGGGGCACATAGA     |
| Fabp4       | ACACCGAGATTTCTTCAAACG  | CCATCTAGGGTTATGATGCTCTTC |
| Krt19       | GGGGGTTTCAGTACGCATTGG  | GAGGACGAGGTCACGAAGC      |
| Msln        | CTTGGGTGGATACCACGTCTG  | CTTCTGTCTTACAGCCATAGCC   |
| Pdgfra      | AGCAGGCAGGGCTTCAACGG   | ACACAGTCTGGCGTGCGTCC     |
| Plin1       | GATCGCCTCTGAACTGAAGG   | CTTCTCGATGCTTCCCAGAG     |
| Tbp         | GAAGCTGCGGTACAATTCCAG  | CCCCTTGTACCCTTCACCAAT    |
| Upk3b       | AGACCTGATTGCCTACGTGC   | GGTGTCTTAGTTGAGACATGCT   |
| Wt1         | AGCACGGTCACTTTCGACG    | GTTTGAAGGAATGGTTGGGGAA   |
